# Mouse Tumor Biology (MTB): a database of mouse models for human cancer

Carol J. Bult\*, Debra M. Krupke, Dale A. Begley, Joel E. Richardson, Steven B. Neuhauser, John P. Sundberg and Janan T. Eppig

The Jackson Laboratory, 600 Main Street, Bar Harbor, ME, USA

Received September 08, 2014; Accepted October 05, 2014

## ABSTRACT

The Mouse Tumor Biology (MTB; <http://tumor.informatics.jax.org>) database is a unique online compendium of mouse models for human cancer. MTB provides online access to expertly curated information on diverse mouse models for human cancer and interfaces for searching and visualizing data associated with these models. The information in MTB is designed to facilitate the selection of strains for cancer research and is a platform for mining data on tumor development and patterns of metastases. MTB curators acquire data through manual curation of peer-reviewed scientific literature and from direct submissions by researchers. Data in MTB are also obtained from other bioinformatics resources including PathBase, the Gene Expression Omnibus and ArrayExpress. Recent enhancements to MTB improve the association between mouse models and human genes commonly mutated in a variety of cancers as identified in large-scale cancer genomics studies, provide new interfaces for exploring regions of the mouse genome associated with cancer phenotypes and incorporate data and information related to Patient-Derived Xenograft models of human cancers.

## INTRODUCTION

The laboratory mouse has long served as a model system for investigations into human biology and disease because its physiology is similar to that of humans, because there is a high degree of conservation in genes and genome organization, and because the mouse genome is amenable to precise manipulation (e.g. transgenesis, targeted mutation, recombineering, *CRISPR/Cas9*, etc.) (1–4). The genetic uniformity of inbred strains contributes to the experimental power of mice to drive discovery of the contributions of specific genes and modifiers for cancer susceptibility and resistance (5). Inbred lines of mice are ideal for identifying and study-

ing low penetrance cancer genes (5,6) which are particularly important for uncovering the genetic basis of susceptibility to cancers in human populations when there is no evidence of familial segregation (7). Studies of mice with induced and engineered changes in specific genes or transgenes have provided fundamental insights into the underlying molecular genetics of cancer initiation and progression (8). Although the limits of model systems for the faithful recapitulation of all aspects of human disease must be appreciated (9,10), the laboratory mouse is widely recognized as the premier animal model for investigating clinically relevant aspects of tumor biology (11–13).

Understanding the influence of genetic background on phenotype variation is critical for the creation of valid mouse models of human cancer and for the appropriate use of these models in cancer research (14). The failure of researchers to appreciate the impact of genetic background can lead to confounding and misleading interpretation of mouse model data. For example, transgenic mice expressing human HRAS on a mixed genetic background of the C57BL/6 and SJL strains were reported to have a mammary gland carcinoma frequency of 45–50% (15). The same transgene allele on an FVB/N strain congenic background resulted in a mammary gland carcinoma frequency of 100% (16). Along similar lines, a recent study reported that both incidence and latency of thymic lymphoma in mouse models varied depending on which genetic background the *Atm*<sup>tm1Awb</sup> allele was introgressed into (17). The impact of drug treatments for specific tumor types also needs to be evaluated in the context of what is 'normal' for the genetic background of the mice in the experiment. For example, a study by Roberts *et al.* (18) demonstrated the importance of genetic background in using animal models to investigate responses to pharmacological intervention.

One of the major trends in translational cancer research is the renewed interest in xenograft models using immunodeficient mice. Although xenografts have been used in cancer research for decades, progressive improvements in the transplant compliant host animal have greatly enhanced the utility of these models in basic and translational cancer research (19). 'Human-in-mouse' xenografts (i.e. Patient-

\*To whom correspondence should be addressed. Tel: +1 207 288 6324; Fax: +1 207 288 6830; Email: carol.bult@jax.org

**Table 1.** Annotation trends in MTB since the project's inception

|                                          | January 1999     | October 2004      | October 2009 | August 2014 |
|------------------------------------------|------------------|-------------------|--------------|-------------|
| Annotated references                     | 142              | 1164              | 2594         | 3730        |
| Tumor frequency records                  | 3699             | 23 778            | 35 832       | 61 655      |
| Genetically defined strains              | 623 <sup>a</sup> | 3559 <sup>a</sup> | 3764         | 6057        |
| Tumors associated with specific genes    | 105              | 800               | 1330         | 2288        |
| Images (histopathology, SKY, FISH, etc.) | —                | 1318              | 3882         | 5886        |
| PDX models                               | —                | —                 | —            | 357         |

<sup>a</sup>Male and female mice were stored as separate strain entries until 2004.

Derived Xenografts, PDX) are created by implanting primary human tumor material directly into an immunodeficient host mouse. Several routes for implantation are possible including subcutaneous, under the renal capsule, tail vein injection or orthotopic. PDX models allow researchers to directly study human cells and tissues *in vivo* (20,21). These models have an advantage over cell lines and cell line xenografts because the tumors retain a more natural architecture and are more reflective of the heterogeneity and histology seen in primary tumors (10). They have an advantage over tumors that arise in genetically engineered mice in that the xenografts retain (at least for a period of time following the initial implantation) a human-specific microenvironment. Several murine hosts are used routinely in xenograft studies, including nude (*Foxn1<sup>nu</sup>*) and SCID (*Prkdc<sup>scid</sup>*). However, much of the current state-of-the-art xenograft research in cancer relies on NOD.Cg-Prkdc<sup>scid</sup> Il2rg<sup>tm1Wjl</sup>/SzJ (NOD *scid* gamma or NSG) mice (20,22). NSG mice lack mature T cells, B cells and functional Natural killer (NK) cells; they are deficient in cytokine signaling. As with genetic models of human cancer, the genetics of the host strain in xenograft models is important for selecting an appropriate model system. Engraftment success of different host strains is variable and an important factor in experimental design of PDX studies (23). Curating this information in the published cancer xenograft literature is one of the future content enhancements planned for Mouse Tumor Biology (MTB) (see Future Directions, below).

The MTB (<http://tumor.informatics.jax.org>) database is a freely available community informatics resource designed to support the effective use of the laboratory mouse as a model system for investigating the genetic and genomic basis of human cancer. MTB provides expertly curated, semantically consistent data to guide researchers in the selection of appropriate strains and mutant mice for experimentation. A fundamental biological principle at the heart of MTB's design and functionality is that the genetic background of mice greatly influences the choice, use, interpretation and translational utility of these models in cancer research. MTB is extending curated content and search functionality beyond the past focus solely on genetic models of human cancer to include mouse models and related data that are important for translational and pre-clinical cancer research. In this paper we describe recent changes to user interface and data acquisition strategies for MTB.

## MTB CONTENT

The MTB database was first released on the World Wide Web in 1998 (24) with a primary focus on genetically engineered mouse models of human cancer. Data in MTB related to these models includes frequency of mouse tumors in the context of specific genetic backgrounds, histopathology images of mouse tumors and information about specific mutations/allelic variants in mouse tumors. As genome sequencing became a common approach for characterizing human tumors (25), we developed new interfaces for MTB to connect lists of human genes commonly mutated in various cancers to mouse models carrying mutations in those genes. As PDX have become increasingly important as a platform for basic cancer research and translational cancer research (26), we have initiated curation efforts to represent this literature and these models in MTB. A summary of the trends in MTB's data content since the inception of the resource is provided in Table 1.

Nomenclature and annotation standards are essential for scientific communication and for accurate and complete data retrieval and aggregation (27). The nomenclature and semantic standards implemented in MTB benefit researchers by greatly simplifying what can be a frustrating and time consuming task of finding and comparing data about mouse models. For all of the gene, allele, mutation and strain data in MTB, curators enforce the nomenclature standards set by the International Committee on Standardized Nomenclature for Mice (<http://www.informatics.jax.org/nomen/>) and the Human Gene Nomenclature Committee (28). An example of the importance of standardized genetic nomenclature is illustrated by alleles of the *Fgfr3* gene (fibroblast growth factor receptor 3, MGI:95524). Mouse models carrying mutations in *Fgfr3* have been observed to promote skin and lung cancer (29), but finding the relevant model using non-standard nomenclature (e.g. *Fgfr3<sup>-/-</sup>* or *Fgfr3<sup>+/+</sup>*) is complicated by the fact that there are over 25 targeted alleles of *Fgfr3* published, with 11 of the alleles originating from the same laboratory that published the observation of increased tumorigenesis in lung and skin. Only one of the 11 alleles, *Fgfr3<sup>tm4Cxd</sup>* (MGI:2135675), in combination with a targeted mutation in *Ctnnb1* (*Ctnnb1<sup>tm1Mmt</sup>*) and on a mixed genetic background, is associated with increased lung tumorigenesis.

For terminologies associated with tumor classification annotations, MTB adopts standards set by pathologist working groups that are convened on a regular basis to evaluate neoplasias of specific anatomical systems and to de-

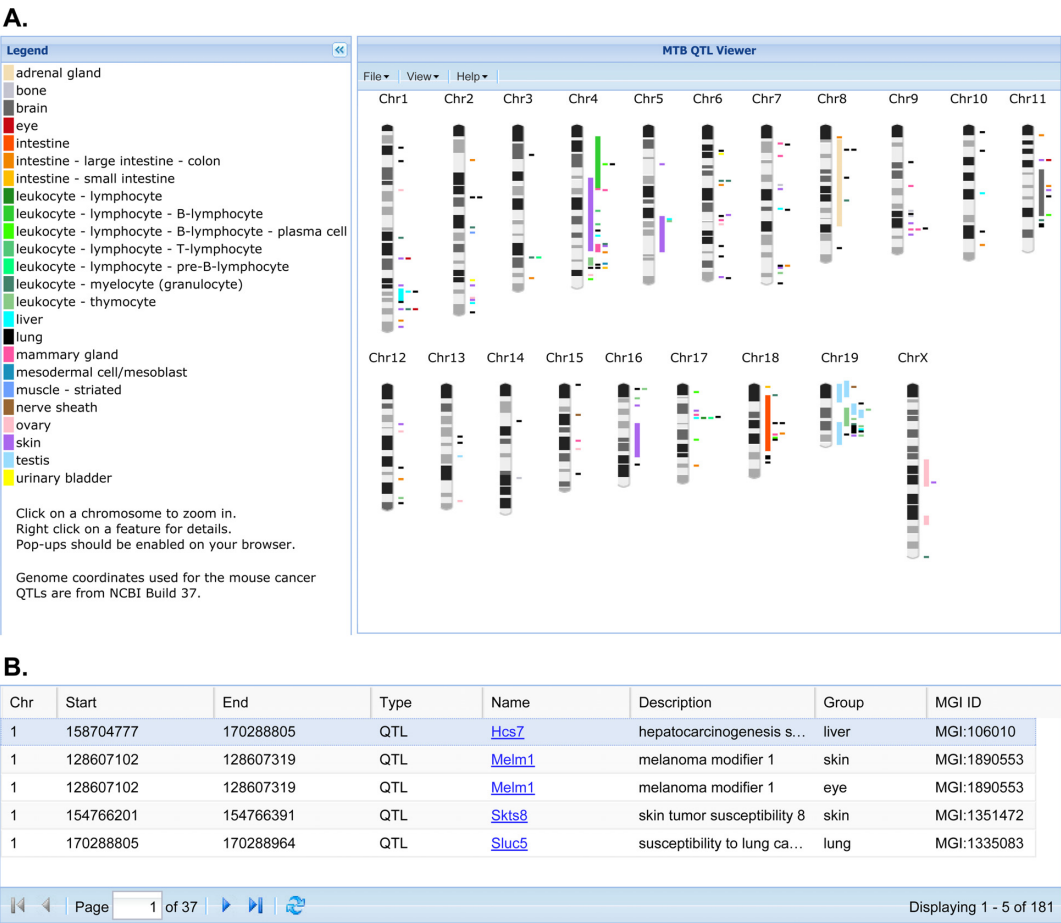

**Figure 1.** (A) Screenshot of MTB's Cancer QTL Viewer showing the display of all annotated cancer QTL regions for the laboratory mouse displayed in genome context. (B) Links to QTL Detail pages in the MGI database.

velop standard diagnoses and terminologies. Examples of standard classifications for mouse tumors to emerge from these workshops include the lymphohematopoietic system (30), lung (31), mammary gland (32), gastrointestinal system (33), nervous system (34), pancreas (35) and prostate (36). We also work with related bioinformatics resources such as PathBase (37) on mapping terms to ensure broad dissemination of standard tumor classification and diagnosis terminologies for mouse models.

## DATABASE ENHANCEMENTS

MTB can be searched using web-based search forms and interactive graphical summaries of mouse strain characteristics related to cancer phenotypes (24,38). Four recent enhancements to data content and user interfaces have been implemented in MTB to further advance the mouse for understanding the genetic and genomic basis of cancer. These enhancements include (i) customizable genome maps of Quantitative Trait Loci (QTL) associated with cancer phenotypes mapped in mice, (ii) search tools for finding data sets associated with cancer genomics studies in laboratory mice in public archives, (iii) search tools for finding mouse models using human gene symbols and (iv) access to infor-

mation and data associated with PDX models of human cancer.

## Cancer QTL in mouse

The laboratory mouse is a powerful genetic model for identifying genes associated with cancer susceptibility and resistance (39). MTB's Cancer QTL Viewer (Figure 1) provides a graphical summary of published cancer-related QTL studies in the mouse that are integrated with the rich biological annotations of mouse genes available from the Mouse Genome Informatics (MGI) database (40). One common starting point for the interface is to display all mapped cancer-related QTL on a genome-wide map. The QTL regions are color coded according to the organ system/cell type associated with the mapping study. In cases where authors provide the symbol of the genetic marker associated with the peak marker-phenotype association score in a mapping study, the QTL is represented by the location of that marker. When authors provide information on the genetic markers that define the boundaries of the QTL region, the entire range of the QTL region is displayed on the map. The cancer QTL graphic in MTB includes a table with links to QTL details in the MGI database. The Cancer QTL Viewer allows users to upload their own unpublished

**A. Search results using pre-compiled human cancer genes**

| Human Gene Symbol | Mouse Gene Symbol      | Name                                                             | Alleles/Transgenes in Strains | Classes of Tumor Specific Alterations |
|-------------------|------------------------|------------------------------------------------------------------|-------------------------------|---------------------------------------|
| APC               | <a href="#">Apc</a>    | adenomatosis polyposis coli                                      | <a href="#">27</a>            | <a href="#">13</a>                    |
| ATM               | <a href="#">Atm</a>    | ataxia telangiectasia mutated                                    | <a href="#">11</a>            | <a href="#">1</a>                     |
| CDKN2A            | <a href="#">Cdkn2a</a> | cyclin-dependent kinase inhibitor 2A                             | <a href="#">22</a>            | <a href="#">7</a>                     |
| EGFR              | <a href="#">Egfr</a>   | epidermal growth factor receptor                                 | <a href="#">9</a>             | <a href="#">3</a>                     |
| EPHA3             | <a href="#">Epha3</a>  | Eph receptor A3                                                  | 0                             | 0                                     |
| EPHA5             | <a href="#">Epha5</a>  | Eph receptor A5                                                  | 0                             | 0                                     |
| ERBB4             | <a href="#">ErbB4</a>  | v-erb-a erythroblastic leukemia viral oncogene homolog 4 (avian) | 0                             | <a href="#">1</a>                     |

**B. Specific alleles and transgenes associated with the gene**

|    |                                                                                                       |                             |                                                                    |
|----|-------------------------------------------------------------------------------------------------------|-----------------------------|--------------------------------------------------------------------|
|    | EGFR, epidermal growth factor receptor (Human)<br>tetO, tetracycline operator (Regulatory - Promoter) | Transgene                   | Tg(tetO-EGFR*delta19)9Hev ( <a href="#">3</a> )                    |
| 11 | Egfr, epidermal growth factor receptor                                                                | Spontaneous mutation        | <i>Egfr<sup>wa2</sup>/Egfr<sup>wa2</sup></i> ( <a href="#">2</a> ) |
| 11 | Egfr, epidermal growth factor receptor                                                                | Chemically induced mutation | <i>Egfr<sup>Wa5</sup>/Egfr<sup>+</sup></i> ( <a href="#">4</a> )   |

**C. Summary of tumor-specific alterations per gene**

|    |                                        |                                      |
|----|----------------------------------------|--------------------------------------|
|    | EGFR, epidermal growth factor receptor | Transgene ( <a href="#">16</a> )     |
| 7  | EGFR, epidermal growth factor receptor | Point mutation ( <a href="#">5</a> ) |
| 11 | Egfr, epidermal growth factor receptor | Insertion ( <a href="#">3</a> )      |

**Figure 2.** Screenshot of a subset of search results using a list of 26 human genes reported as frequently mutated in human lung adenocarcinoma in Ding *et al.* (43). Search results provide rapid access to (A) alleles/genotypes in different strains of mice and (B) to the types of genetic variants/alterations that have been observed for the gene in mouse tumors.

annotations in a simple GFF-formatted file (General Feature Format; <http://www.sanger.ac.uk/resources/software/gff/>) so they can be displayed in relationship to published QTL regions. By highlighting a sub region of a chromosome of interest, users are directed to another workspace where they can filter the genes in a region according to the biological (phenotype and function) annotations of those genes. For example, a researcher could identify a region of the genome where multiple lung cancer QTL have been mapped and then filter the genes in that region to find those previously associated with lung phenotypes, biological processes or molecular functions.

### Cancer genomics

Genomics technologies are now used routinely to characterize the genomes of primary human tumors and of tumors in genetically defined mouse models. Although many of the genome-scale data from these studies are available from public data archives it can be difficult for researchers to find data sets that include specific mouse strain information or are associated with specific tumor types due to the lack of adherence to standardized gene and strain nomenclature. To support rapid access to mouse cancer genomics

data, MTB indexes public genomic data archives such as Gene Expression Omnibus (GEO) (41) and ArrayExpress (42) with standardized nomenclature. The Gene Expression Data Set Search Form in MTB allows users to search for data sets in these archives by organ, tumor classification, strain name and assay platform. The search results allow users to rapidly access study information and the data for each sample in the relevant public archive and are also linked to relevant mouse model data in MTB.

To link the results of large-scale human cancer genomics studies to mouse models, MTB curators have compiled lists of human cancer genes identified from published cancer genome surveys. These lists are provided on the Human Gene Search form in MTB and can be downloaded or used as input to search the MTB for mouse models associated with each of the genes in the list. The search form also allows *ad hoc* searches of mouse models in MTB using human gene symbols. An example of a search of MTB using the precompiled list of 26 human genes identified as being frequently mutated in a survey of 188 human lung adenocarcinomas (43) is shown in Figure 2.



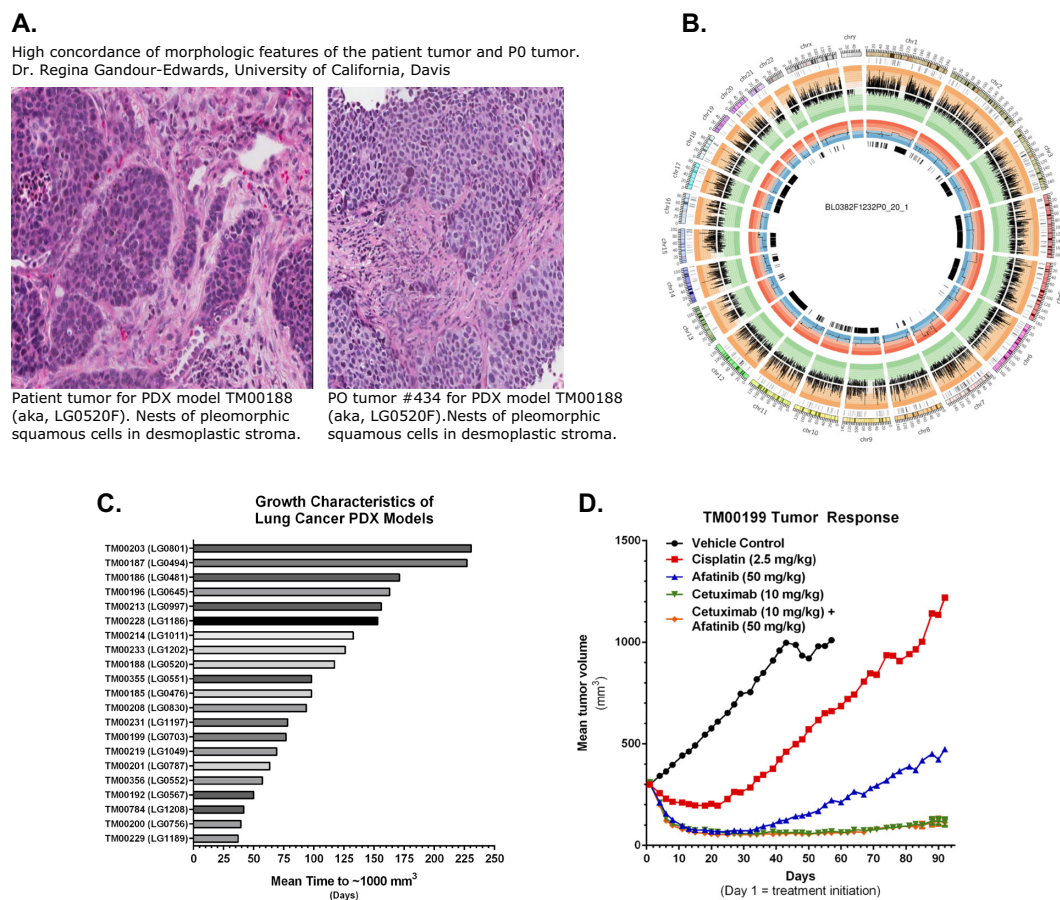

**Figure 3.** Examples of PDX characterization data accessed from MTB's PDX model web portal. (A) Description of the concordance of morphological features of primary patient tumor and engrafted tumors. (B) Circos plot showing integration of genomic data from PDX tumor. (C) Tumor growth characteristics of similar tumors in different PDX models. (D) Tumor growth curves from a drug response study comparing four different treatments in tumor-bearing mice.

## PDX

MTB supports online access to all of the available PDX models from The Jackson Laboratory's PDX Resource. The models in this resource have been comprehensively annotated for clinical information (de-identified) about the patients from whom the primary tumor material was obtained, histopathology and diagnostic marker labeling, whole genome copy number variation (CNV), genome-wide transcriptional profiling and targeted exome sequencing. Subsets of the models have tumor growth data and standard of care drug response data from dosing studies in tumor-bearing mice. When histopathology images of both the primary patient tumor and the engrafted tumors are available, a board certified pathologist reviews the images and provides a summary of the degree to which there is concordance of the morphological features between the primary and engrafted tumors. The user interfaces to the PDX associated data support searches for models by cancer type, patient diagnosis and genomic properties of the engrafted tumor (expression, CNV and/or mutation) (Figure 3). Tabular summaries of variants identified in the engrafted tumors and graphical summaries of gene expression, amplifications and deletions are also provided for each model. Users can

request information on the availability of tumor fragments and tumor-bearing mice using a web-based form that is forwarded to the customer services group at The Jackson Laboratory.

## FUTURE DIRECTIONS

MTB initially was designed to serve as a centralized resource of information regarding mouse models of human cancer, with a focus on emphasizing how the genetic background of different strains of laboratory mice can influence cancer phenotypes in genetically engineered mice. Mice as genetic models of human cancer will continue to be a focus for the resource and we will integrate two emerging sources of data in this area in the near future. First we will curate cancer-related phenotype information in data emerging from large-scale phenotyping initiatives associated with the international Knockout Mouse Project (44,45). A second source of new data in MTB will come from complex trait mapping studies using new high-precision mapping populations such as Diversity Outbred mice (46).

While mouse model representation will continue to be a primary and unique focus for the MTB database project, many of the planned enhancements to the resource will em-

phasize promoting the use of mouse models in translational and pre-clinical cancer research. We will accomplish this goal by highlighting data used to validate the human cancer relevance of mouse models (i.e. data associated with model ‘credentialing’) and by adding PDX models and data. Specific planned enhancements to MTB include interfaces that highlight the genomic and histopathology concordance of mouse models and human cancers. We also are working with other informatics groups to develop improved interfaces for navigating conserved syntenic regions of the mouse and human genome, enabling better integration of complex trait mapping studies in the mouse with genome-wide association study data in humans. The representation of PDX models in MTB is currently centered on The Jackson Laboratory’s PDX Resource, however we will incorporate information and data from other PDX resources and repositories when possible.

## INFRASTRUCTURE

The MTB database system has three major software components:

- 1) The public web interface runs from version 5.x of the Apache Jakarta Tomcat Web Server and utilizes the Apache Struts Framework. The web interface utilizes Java technology conforming to the 2.4/2.0 Java Servlet/Java Server Pages specifications. We leverage ExtJS and Google Visualizations Javascript libraries for data visualization on the public web interface to MTB.
- 2) The curatorial interface for MTB is a Java-based desktop application used by the Scientific Curators to enter and curate data. Curator interfaces are built using a rich set of custom Java libraries designed around the Core J2EE Design Patterns.
- 3) The database itself is a highly normalized relational database currently housed in MySQL. JDBC is used to access the data repository

The MTB Application Programming Interface (API) facilitates the exchange of data with users and with other database systems. In keeping with our software design goals of ‘write once, run anywhere’, Web Services via SOAP is the primary access to the MTB API suite. This design supports access to MTB data in a platform and language independent manner that suits the differing needs, standards and tools of the community.

## USER SUPPORT

The MTB Database can be accessed at the MTB Home Page (<http://tumor.informatics.jax.org>), which is part of the MGI group web pages (<http://www.informatics.jax.org>). Announcements about new MTB features are released via the MTB web site as well as the MGI FaceBook page. User support for MTB is available in the form of online documentation, email, fax and phone:

Web: <http://www.informatics.jax.org/mgihome/support/support.shtml>

Email: [mgi-help@jax.org](mailto:mgi-help@jax.org)

Tel: +1 207.288.6445

Fax: +1 207.288.6830

FaceBook: <https://www.facebook.com/mgi.informatics>

## DATA USE AND RESOURCE CITATION

MTB data and software are provided freely to the scientific community for promoting education and research activities. Any reproduction or use for commercial purpose is prohibited without the prior express written permission of The Jackson Laboratory.

Users of MTB are encouraged to cite this paper when referring to MTB in a publication. The following format is suggested when referring to specific data obtained from MTB: Mouse Tumor Biology Database (MTB), Mouse Genome Informatics Group, The Jackson Laboratory, Bar Harbor, Maine, USA. World Wide Web (<http://tumor.informatics.jax.org>). [Include the date (month/year) when the data were retrieved.]

## ACKNOWLEDGEMENTS

We thank Drs Judith Blake and Joel Wagner for helpful comments on earlier versions of this manuscript.

## FUNDING

The MTB database is supported by the National Institutes of Health [CA089713]. Research reported in this publication was partially supported by the National Cancer Institute [P30CA034196]. Funding for open access charge: NCI grant CA089713.

*Conflict of interest statement.* The content is solely the responsibility of the authors and does not necessarily represent the official views of the NIH.

## REFERENCES

1. Rosenthal, N. and Brown, S. (2007) The mouse ascending: perspectives for human-disease models. *Nat. Cell Biol.*, **9**, 993–999.
2. Justice, M.J., Siracusa, L.D. and Stewart, A.F. (2011) Technical approaches for mouse models of human disease. *Dis. Models Mech.*, **4**, 305–310.
3. Paigen, K. (1995) A miracle enough: the power of mice. *Nat. Med.*, **1**, 215–220.
4. Mali, P., Yang, L., Esvelt, K.M., Aach, J., Guell, M., DiCarlo, J.E., Norville, J.E. and Church, G.M. (2013) RNA-guided human genome engineering via Cas9. *Science*, **339**, 823–826.
5. Ewart-Toland, A. and Balmain, A. (2004) The genetics of cancer susceptibility: from mouse to man. *Toxicol. Pathol.*, **32**(Suppl. 1), 26–30.
6. Quigley, D. and Balmain, A. (2009) Systems genetics analysis of cancer susceptibility: from mouse models to humans. *Nat. Rev. Genet.*, **10**, 651–657.
7. Demant, P. (2003) Cancer susceptibility in the mouse: genetics, biology and implications for human cancer. *Nat. Rev. Genet.*, **4**, 721–734.
8. Politi, K. and Pao, W. (2011) How genetically engineered mouse tumor models provide insights into human cancers. *J. Clin. Oncol.*, **29**, 2273–2281.
9. McGonigle, P. and Ruggeri, B. (2014) Animal models of human disease: challenges in enabling translation. *Biochem. Pharmacol.*, **87**, 162–171.
10. Kopetz, S., Lemos, R. and Powis, G. (2012) The promise of patient-derived xenografts: the best laid plans of mice and men. *Clin. Cancer Res.*, **18**, 5160–5162.
11. Walrath, J.C., Hawes, J.J., Van Dyke, T. and Reilly, K.M. (2010) Genetically engineered mouse models in cancer research. *Adv. Cancer Res.*, **106**, 113–164.

12. Khaled, W.T. and Liu, P. (2014) Cancer mouse models: past, present and future. *Semin. Cell Dev. Biol.*, **27**, 54–60.
13. Malaney, P., Nicosia, S.V. and Dave, V. (2014) One mouse, one patient paradigm: new avatars of personalized cancer therapy. *Cancer Lett.*, **344**, 1–12.
14. Sundberg, J.P., Roopenian, D.C., Liu, E.T. and Schofield, P.N. (2013) The Cinderella effect: searching for the best fit between mouse models and human diseases. *J. Invest. Dermatol.*, **133**, 2509–2513.
15. Nielsen, L.L., Discafani, C.M., Gurnani, M. and Tyler, R.D. (1991) Histopathology of salivary and mammary gland tumors in transgenic mice expressing a human Ha-ras oncogene. *Cancer Res.*, **51**, 3762–3767.
16. Nielsen, L.L., Gurnani, M., Catino, J.J. and Tyler, R.D. (1995) In wap-ras transgenic mice, tumor phenotype but not cyclophosphamide-sensitivity is affected by genetic background. *Anticancer Res.*, **15**, 385–392.
17. Genik, P.C., Bielefeldt-Ohmann, H., Liu, X., Story, M.D., Ding, L., Bush, J.M., Fallgren, C.M. and Weil, M.M. (2014) Strain background determines lymphoma incidence in Atm knockout mice. *Neoplasia*, **16**, 129–136.
18. Roberts, R.B., Arteaga, C.L. and Threadgill, D.W. (2004) Modeling the cancer patient with genetically engineered mice: prediction of toxicity from molecule-targeted therapies. *Cancer Cell*, **5**, 115–120.
19. Shultz, L.D., Brehm, M.A., Garcia-Martinez, J.V. and Greiner, D.L. (2012) Humanized mice for immune system investigation: progress, promise and challenges. *Nat. Rev. Immunol.*, **12**, 786–798.
20. Shultz, L.D., Ishikawa, F. and Greiner, D.L. (2007) Humanized mice in translational biomedical research. *Nat. Rev. Immunol.*, **7**, 118–130.
21. Brehm, M.A., Shultz, L.D. and Greiner, D.L. (2010) Humanized mouse models to study human diseases. *Curr. Opin. Endocrinol. Diabetes Obes.*, **17**, 120–125.
22. Zhou, Q., Facciponte, J., Jin, M., Shen, Q. and Lin, Q. (2014) Humanized NOD-SCID IL2rg(-/-) mice as a preclinical model for cancer research and its potential use for individualized cancer therapies. *Cancer Lett.*, **344**, 13–19.
23. Shultz, L.D., Goodwin, N., Ishikawa, F., Hosur, V., Lyons, B.L. and Greiner, D.L. (2014) Human cancer growth and therapy in immunodeficient mouse models. *Mouse Models of Cancer: A Laboratory Manual*. Cold Spring Harbor Press Protocols, NY.
24. Bult, C.J., Krupke, D.M. and Eppig, J.T. (1999) Electronic access to mouse tumor data: the Mouse Tumor Biology Database (MTB) project. *Nucleic Acids Res.*, **27**, 99–105.
25. Mardis, E.R. and Wilson, R.K. (2009) Cancer genome sequencing: a review. *Hum. Mol. Genet.*, **18**, R163–R168.
26. Siolas, D. and Hannon, G.J. (2013) Patient-derived tumor xenografts: transforming clinical samples into mouse models. *Cancer Res.*, **73**, 5315–5319.
27. Sundberg, J.P. and Schofield, P.N. (2009) A mouse by any other name. *J. Invest. Dermatol.*, **129**, 1599–1601.
28. Gray, K.A., Daugherty, L.C., Gordon, S.M., Seal, R.L., Wright, M.W. and Bruford, E.A. (2013) Genenames.org: the HGNC resources in 2013. *Nucleic Acids Res.*, **41**, D545–D552.
29. Ahmad, I., Singh, L.B., Foth, M., Morris, C.A., Taketo, M.M., Wu, X.R., Leung, H.Y., Sansom, O.J. and Iwata, T. (2011) K-Ras and beta-catenin mutations cooperate with Fgfr3 mutations in mice to promote tumorigenesis in the skin and lung, but not in the bladder. *Dis. Models Mech.*, **4**, 548–555.
30. Kogan, S.C., Ward, J.M., Anver, M.R., Berman, J.J., Brayton, C., Cardiff, R.D., Carter, J.S., de Coronado, S., Downing, J.R., Fredrickson, T.N. *et al.* (2002) Bethesda proposals for classification of nonlymphoid hematopoietic neoplasms in mice. *Blood*, **100**, 238–245.
31. Nikitin, A.Y., Alcaraz, A., Anver, M.R., Bronson, R.T., Cardiff, R.D., Dixon, D., Fraire, A.E., Gabrielson, E.W., Gunning, W.T., Haines, D.C. *et al.* (2004) Classification of proliferative pulmonary lesions of the mouse: recommendations of the mouse models of human cancers consortium. *Cancer Res.*, **64**, 2307–2316.
32. Cardiff, R.D., Anver, M.R., Gusterson, B.A., Hennighausen, L., Jensen, R.A., Merino, M.J., Rehm, S., Russo, J., Tavassoli, F.A., Wakefield, L.M. *et al.* (2000) The mammary pathology of genetically engineered mice: the consensus report and recommendations from the Annapolis meeting. *Oncogene*, **19**, 968–988.
33. Washington, M.K., Powell, A.E., Sullivan, R., Sundberg, J.P., Wright, N., Coffey, R.J. and Dove, W.F. (2013) Pathology of rodent models of intestinal cancer: progress report and recommendations. *Gastroenterology*, **144**, 705–717.
34. Weiss, W.A., Israel, M., Cobbs, C., Holland, E., James, C.D., Louis, D.N., Marks, C., McClatchey, A.I., Roberts, T., Van Dyke, T. *et al.* (2002) Neuropathology of genetically engineered mice: consensus report and recommendations from an international forum. *Oncogene*, **21**, 7453–7463.
35. Hruban, R.H., Rustgi, A.K., Brentnall, T.A., Tempero, M.A., Wright, C.V. and Tuveson, D.A. (2006) Pancreatic cancer in mice and man: the Penn Workshop 2004. *Cancer Res.*, **66**, 14–17.
36. Pienta, K.J., Abate-Shen, C., Agus, D.B., Attar, R.M., Chung, L.W., Greenberg, N.M., Hahn, W.C., Isaacs, J.T., Navone, N.M., Peehl, D.M. *et al.* (2008) The current state of preclinical prostate cancer animal models. *Prostate*, **68**, 629–639.
37. Schofield, P.N., Gruenberger, M. and Sundberg, J.P. (2010) PathBase and the MPATH ontology. Community resources for mouse histopathology. *Vet. Pathol.*, **47**, 1016–1020.
38. Begley, D.A., Krupke, D.M., Vincent, M.J., Sundberg, J.P., Bult, C.J. and Eppig, J.T. (2007) Mouse Tumor Biology Database (MTB): status update and future directions. *Nucleic Acids Res.*, **35**, D638–D642.
39. Drinkwater, N.R. and Gould, M.N. (2012) The long path from QTL to gene. *PLoS Genet.*, **8**, e1002975.
40. Blake, J.A., Bult, C.J., Eppig, J.T., Kadin, J.A., Richardson, J.E. and Mouse Genome Database, G. (2014) The Mouse Genome Database: integration of and access to knowledge about the laboratory mouse. *Nucleic Acids Res.*, **42**, D810–D817.
41. Barrett, T., Wilhite, S.E., Ledoux, P., Evangelista, C., Kim, I.F., Tomashevsky, M., Marshall, K.A., Phillippy, K.H., Sherman, P.M., Holko, M. *et al.* (2013) NCBI GEO: archive for functional genomics data sets—update. *Nucleic Acids Res.*, **41**, D991–D995.
42. Rustici, G., Kolesnikov, N., Brandizi, M., Burdett, T., Dylag, M., Emam, I., Farne, A., Hastings, E., Ison, J., Keays, M. *et al.* (2013) ArrayExpress update—trends in database growth and links to data analysis tools. *Nucleic Acids Res.*, **41**, D987–D990.
43. Ding, L., Getz, G., Wheeler, D.A., Mardis, E.R., McLellan, M.D., Cibulskis, K., Sougnez, C., Greulich, H., Muzny, D.M., Morgan, M.B. *et al.* (2008) Somatic mutations affect key pathways in lung adenocarcinoma. *Nature*, **455**, 1069–1075.
44. Bradley, A., Anastassiadis, K., Ayadi, A., Battey, J.F., Bell, C., Birling, M.C., Bottomley, J., Brown, S.D., Burger, A., Bult, C.J. *et al.* (2012) The mammalian gene function resource: the International Knockout Mouse Consortium. *Mamm. Genome*, **23**, 580–586.
45. Brown, S.D. and Moore, M.W. (2012) The International Mouse Phenotyping Consortium: past and future perspectives on mouse phenotyping. *Mamm. Genome*, **23**, 632–640.
46. Svenson, K.L., Gatti, D.M., Valdar, W., Welsh, C.E., Cheng, R., Chesler, E.J., Palmer, A.A., McMillan, L. and Churchill, G.A. (2012) High-resolution genetic mapping using the Mouse Diversity outbred population. *Genetics*, **190**, 437–447.
